# Supplementary material for: Chemical space, diversity and activity landscape analysis of estrogen receptor binders
Source: Royal Society of Chemistry journal article supplement (doi:10.1039/c8ra07604a), 2018-01-01
Supplement: c8ra07604a1.pdf [file c8ra07604a1.pdf]

## SUPPLEMENTARY INFORMATION

### Chemical space, diversity and activity landscape analysis of estrogen receptor binders

J. Jesús Naveja,<sup>1,2,3</sup> Ulf Norinder,<sup>4,5</sup> Daniel Mucs,<sup>4,6</sup> Edgar López-López,<sup>1,7</sup> José L. Medina-Franco<sup>\*1</sup>

<sup>1</sup>Department of Pharmacy, School of Chemistry, Universidad Nacional Autónoma de México, Mexico City, 04510, Mexico

<sup>2</sup>PECEM, Faculty of Medicine, Universidad Nacional Autónoma de México, Mexico City, 04510, Mexico

<sup>3</sup>Department of Life Science Informatics, Bonn-Aachen International Center for Information Technology, University of Bonn, Bonn, 53113, Germany

<sup>4</sup>Swetox, Karolinska Institutet, Unit of Toxicology Sciences, SE-151 36 Södertälje, Sweden

<sup>5</sup>Department of Computer and Systems Sciences, Stockholm University, Box 7003, SE-164 07 Kista, Sweden

<sup>6</sup>Unit of Work Environment Toxicology, Institute of Environmental Medicine, Karolinska Institutet, Stockholm, Sweden

<sup>7</sup>Medicinal Chemistry Laboratory, University of Veracruz, Veracruz, Mexico

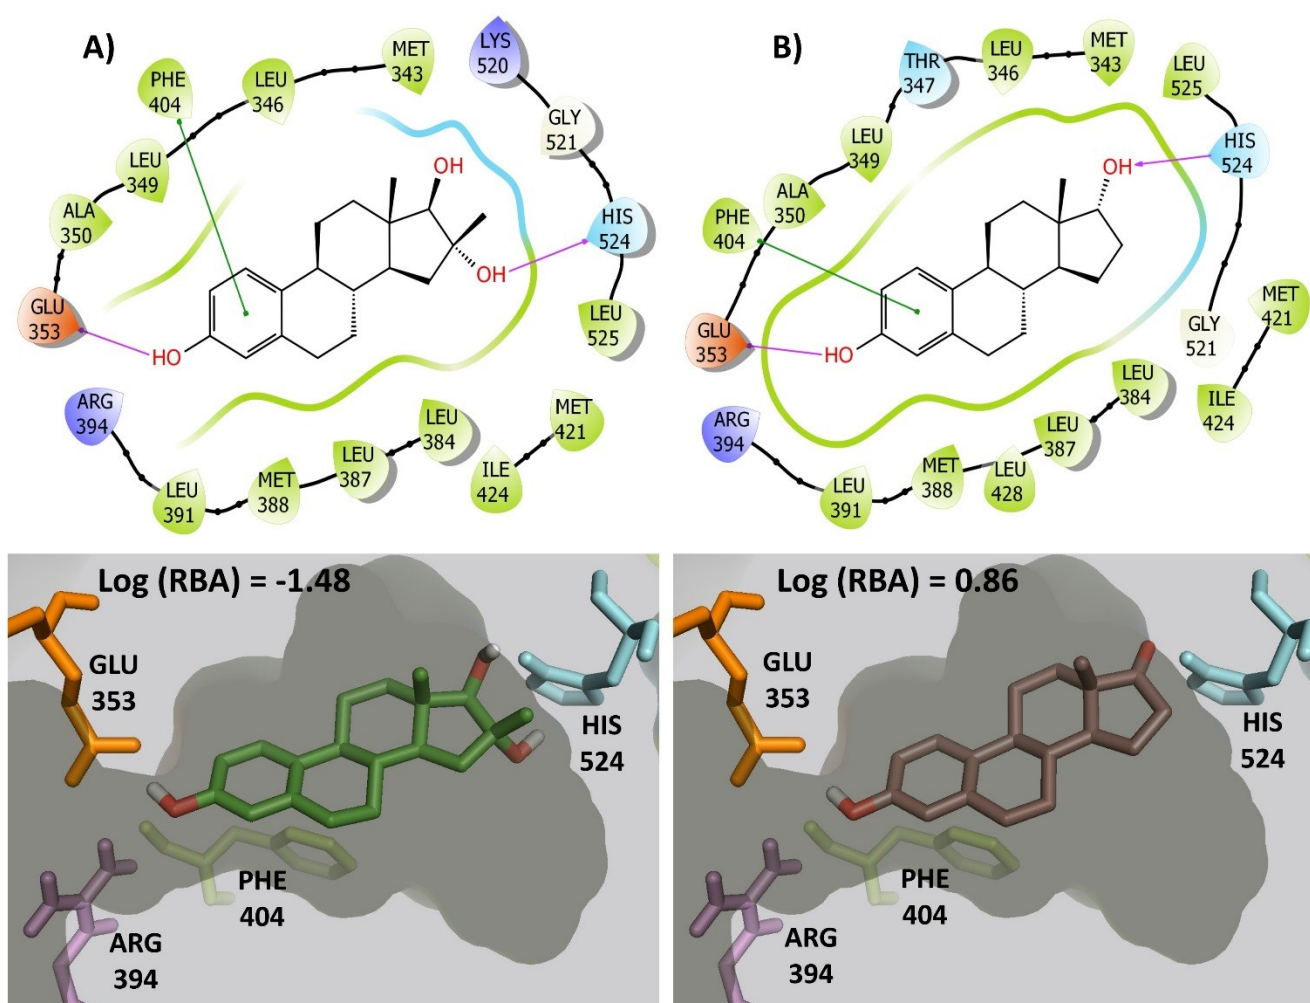

**Figure S1.** 2D and 3D representation of representative activity cliff generators and selected pairs of compounds with greater difference in activity. **A)** 16beta-ol-16alfa-methyl-3-methyl-estradiol and **B)** estrone. The figure includes the value of the relative binding affinity (RBA) as reported by.<sup>14</sup>

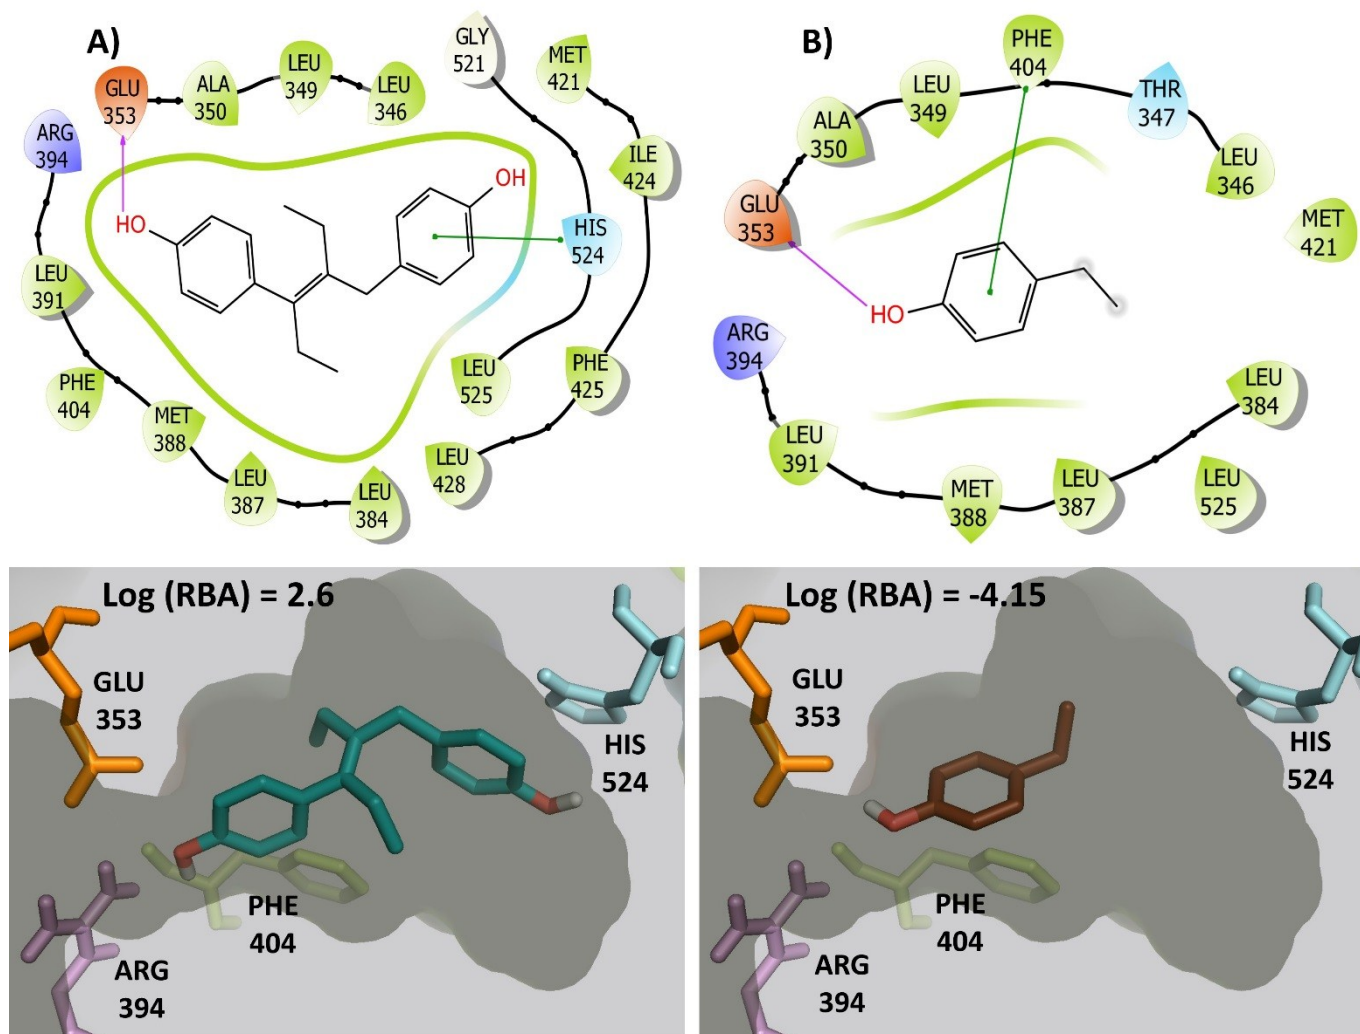

**Figure S2.** 2D and 3D representation of representative activity cliff generators and selected pairs of compounds with greater difference in activity. **A)** diethylstilbestrol and **B)** 4-ethylphenol. The figure includes the value of the relative binding affinity (RBA) as reported by.<sup>14</sup>
